# Supplementary material for: Promoted Viability and Differentiated Phenotype of Cultured Chondrocytes With Low Level Laser Irradiation Potentiate Efficacious Cells for Therapeutics
Source: PubMed Central journal article supplement (PMC7272569; doi:10.3389/fbioe.2020.00468), 2020-05-29
Supplement: Table_1.pdf [file Table_1.pdf]

**Table 1.** Primers designed for qRT-PCR analysis\*

| Target genes                                                 | Acc. No.       | Sequence (5'---3')                                         | Amplicon size (bp) |
|--------------------------------------------------------------|----------------|------------------------------------------------------------|--------------------|
| <b>Rabbit chondrocyte growth and phenotype related genes</b> |                |                                                            |                    |
| <i>ACAN</i>                                                  | XM_002723376   | FWD: GGATGGACACCCCCTACAA<br>REV: AGGGGACGTCATTCCACTC       | 122                |
| <i>Col1-a1</i>                                               | XM_017348831.1 | FWD: TGCCCAGAAGAAGTGGTACA<br>REV: AAGCCATCGGTCATGCTCTC     | 81                 |
| <i>Col2-a1</i>                                               | NM_001195671   | FWD: GACGACATAATCTGTGAAGACACC<br>REV: GTTCTCCTTTCTGCCCTTTG | 133                |
| <i>CTNNA1</i>                                                | XM_002713075   | FWD: ATGACTCGAGCTCAGAGGGT<br>REV: TCGTGTTCAGCATTTGGG       | 144                |
| <i>IL-1<math>\beta</math></i>                                | NM_001082201.1 | FWD: GGTGTTGTCTGGCACGTATG<br>REV: GGCCACAGGTATCTTGTCGT     | 124                |
| <i>Sox9</i>                                                  | XM_002719499   | FWD: CTGGAGACTGCTGAACGAGAG<br>REV: GGTAATTGTAGTCCGGGTGGT   | 98                 |
| <b>Rabbit cell death and destructive factors</b>             |                |                                                            |                    |
| <i>ADAMTS5</i>                                               | XM_002716775.3 | FWD: CCATGAGGAGCACTACGACG<br>REV: ATATGGTCCCAACGTCTGCC     | 101                |
| <i>Cas-3</i>                                                 | NM_001082117.1 | FWD: GCATATTCCACAGCACCTGG<br>REV: TGTCGCTACCTTCCGGTTCA     | 150                |
| <i>FADD</i>                                                  | XM_008253090.2 | FWD: GAAGTCACAGCTGGAATGGC<br>REV: CCTGAACGCGTGGTTTCTTT     | 95                 |
| <i>MMP-13</i>                                                | NM_001082037.1 | FWD: CCTACACCGGCAAGAGTCAC<br>REV: GGTGTTTATGGTTGGGGTCT     | 99                 |
| <i>TNF-a</i>                                                 | NM_001082263.1 | FWD: ACAAGCCTCTAGCCACGTA<br>REV: AGATGAGGTACAGCCCGTCG      | 147                |
| <i>TNFR1</i>                                                 | XM_002712835.3 | FWD: GGAAGTGTGAAAACGGCACC<br>REV: TGTCATGGTCCACTGTGCAA     | 123                |
| <i>TRADD</i>                                                 | XM_008257435.2 | FWD: GTCGGACATCTACGCACAGC<br>REV: ATCTTGAGCATTTGCACCACG    | 108                |
| <b>Rabbit internal control-house-keeping gene</b>            |                |                                                            |                    |
| <i>GAPDH</i>                                                 | NM_001082253   | FWD: AGGGCTGCTTTTAACTCTGG<br>REV: ATGACCAGCTTCCCGTTCT      | 149                |
| <b>Human death and destructive genes</b>                     |                |                                                            |                    |
| <i>Cas-3</i>                                                 | XM_011532301.1 | FWD: CCATTGTTTGTGGGAAATCG<br>REV: GGAGGTGAAGGTGGAAGTGG     | 152                |
| <i>FADD</i>                                                  | NM_003824.3    | FWD: CTGGCTCGTCAGCTCAAAGT<br>REV: GTTGCCTTCTCCTTCTCTGTG    | 128                |
| <i>IL-1<math>\beta</math></i>                                | NM_000576.3    | FWD: GCCCTAAACAGATGAAGTGCTC<br>REV: GAACCAGCATCTTCCTCAG    | 156                |
| <i>MMP-13</i>                                                | NM_002427.3    | FWD: TTGAGCTGGACTCATTGTCG                                  |                    |

|                                                  |                |                           |     |
|--------------------------------------------------|----------------|---------------------------|-----|
|                                                  |                | REV: CGCGAGATTTGTAGGATGGT | 126 |
| <i>TNFR1</i>                                     | NM_001346091.1 | FWD: CCATTGTTTGTGGGAAATCG |     |
|                                                  |                | REV: GGAGGTGAAGGTGGAAGTGG | 152 |
| <i>TRADD</i>                                     | XM_005256213.3 | FWD: TTTGAGTTGCATCCTAGCCC |     |
|                                                  |                | REV: GCACTTCAGATTCGCAGC   | 88  |
| <b>Human internal control-house-keeping gene</b> |                |                           |     |
| <i>GAPDH</i>                                     | NM_001289746.1 | FWD: ACACCCACTCCTCCACCTTT |     |
|                                                  |                | REV: TTACTCCTTGGAGGCCATGT | 143 |

---

\*These genes, from both rabbit and human, markedly fall into 2 categories, chondrocyte growth and phenotype defining genes, and cell death and destructive factors. *GAPDH* serves as an internal reference gene for quantitation.
